# Supplementary material for: Directional anchoring patterned liquid-infused superamphiphobic surfaces for high-throughput droplet manipulation
Source: Royal Society of Chemistry journal article supplement (doi:10.1039/d0lc01037e), 2021-01-01
Supplement: d0lc01037e1.pdf [file d0lc01037e1.pdf]

## Electronic Supplementary Information

### Directional Anchoring Patterned Liquid-Infused Superamphiphobic Surfaces for High-Throughput Droplet Manipulation

*Weijian Liu, Xiao Luo, Changhao Chen, Guochen Jiang, Xinyu Hu, Hongjun Zhang, Minlin Zhong\**

Laser Materials Processing Research Center  
School of Materials Science & Engineering  
Tsinghua University  
Beijing, 100080, P.R. China  
Email: zhml@tsinghua.edu.cn

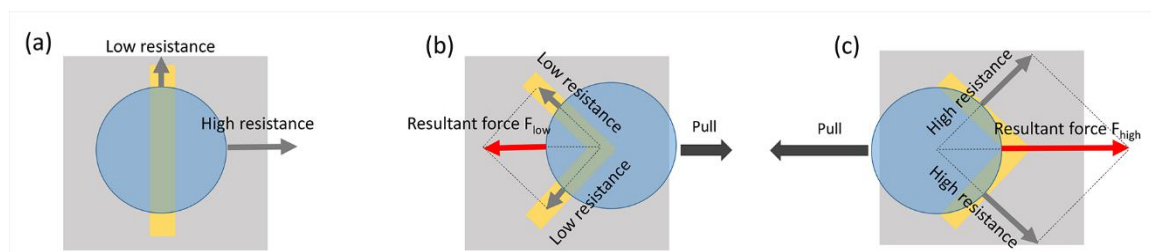

**Figure S1.** The design blueprint of directional-anchoring liquid-infused superamphiphobic surface.

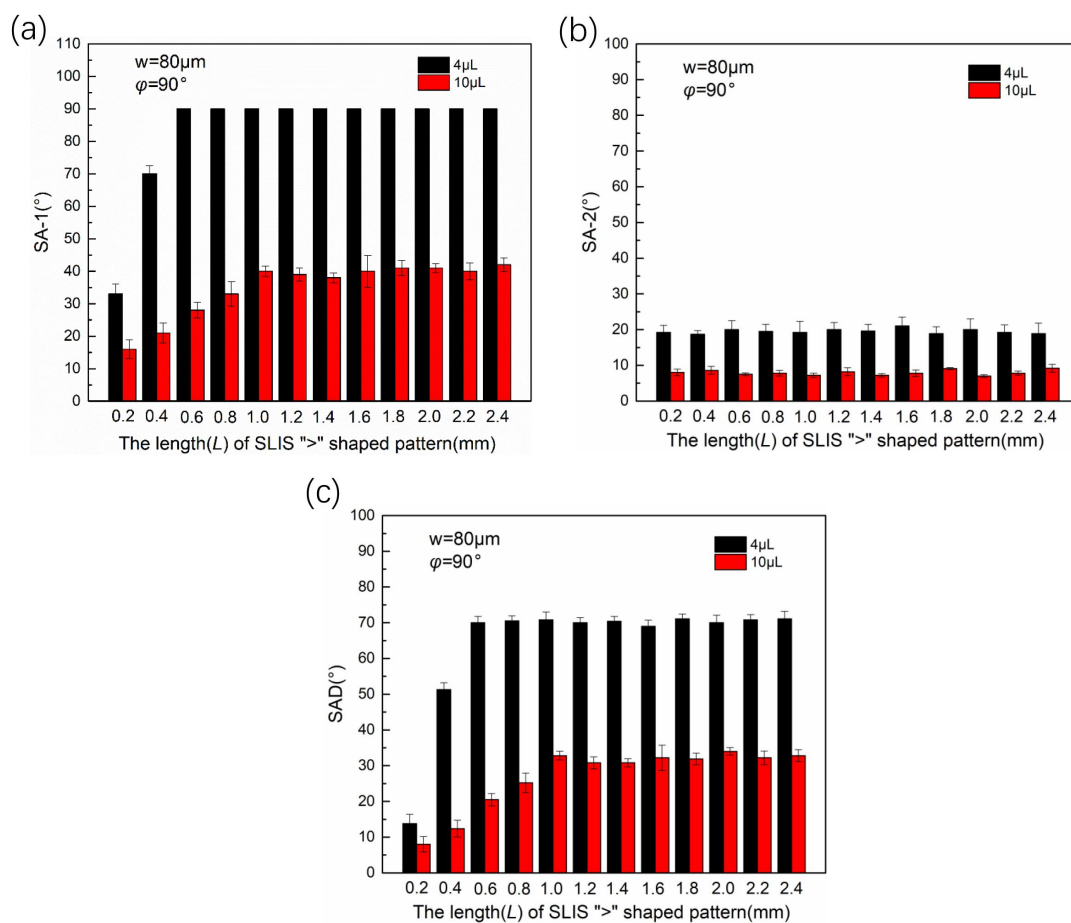

**Figure S2.** The influence of the length (L) on the sliding angle and sliding angle difference. (a) The sliding angle of 4  $\mu\text{L}$  and 10  $\mu\text{L}$  droplets along the direction 1 (D1) on the surfaces with SLIS ">" shaped patterns. (b) The sliding angle of 4  $\mu\text{L}$  and 10  $\mu\text{L}$  droplets along the direction 2 (D2) on the surfaces with SLIS ">" shaped patterns. (c) The sliding angle difference along two directions.

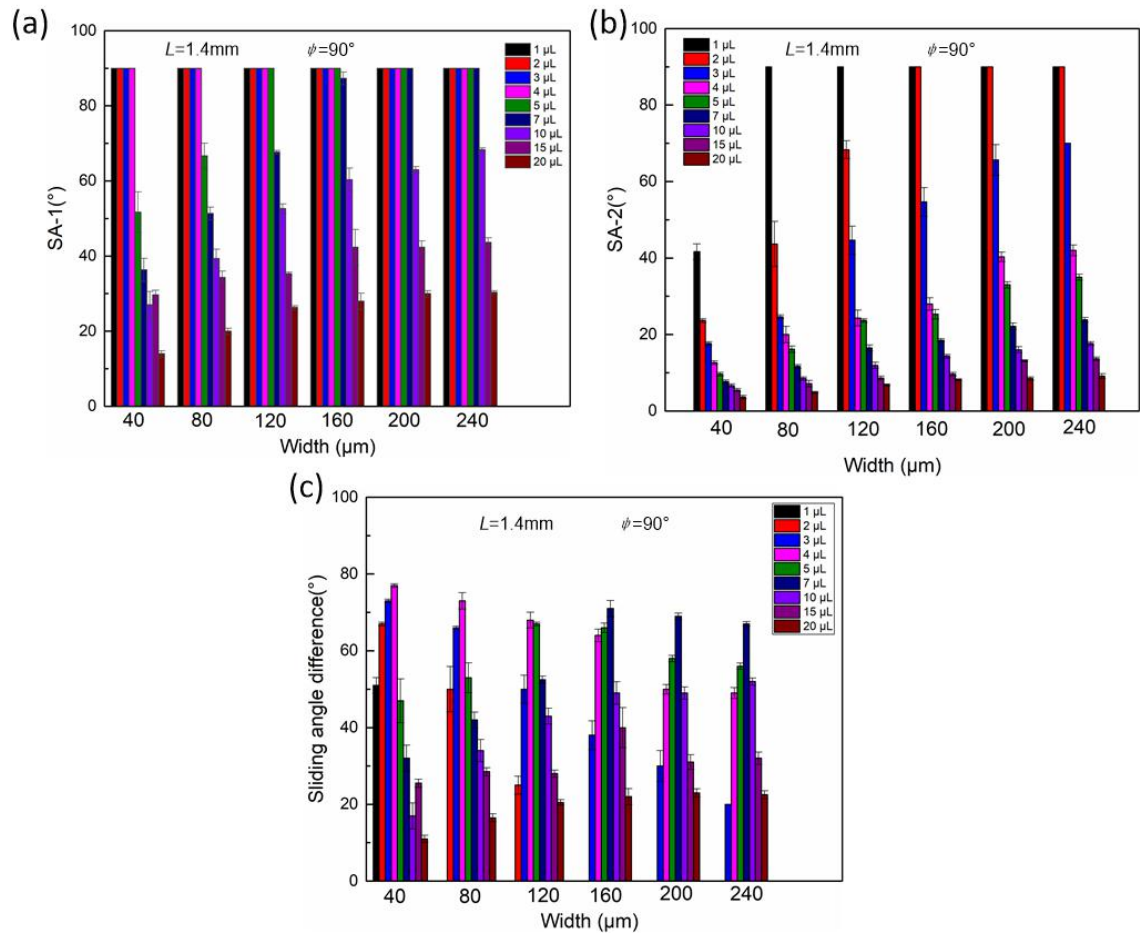

**Figure S3.** The sliding angles and sliding angle differences of the SDAs with the width from 40  $\mu\text{m}$  to 240  $\mu\text{m}$  as the droplet volumes increase from 1  $\mu\text{L}$  to 20  $\mu\text{L}$ . (a) The sliding angles along direction 1 (D1). (b) The sliding angles along direction 2 (D2). (c) The sliding angle differences.

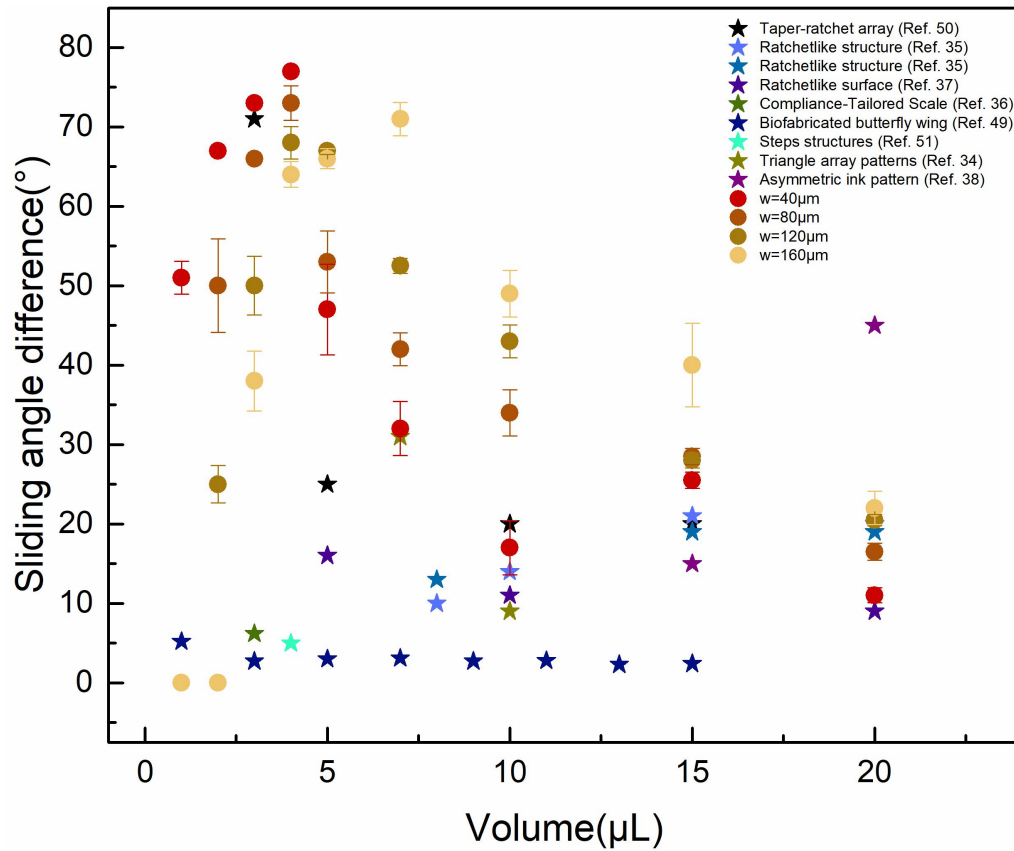

**Figure S4.** The comparison between the DASs and other related works. The DASs show superior sliding angle difference as the droplet volume increase from 1  $\mu\text{L}$  to 20  $\mu\text{L}$ . Especially, when the volume is 4  $\mu\text{L}$ , the sliding angle difference can achieve as high as  $\sim 77^\circ$ .

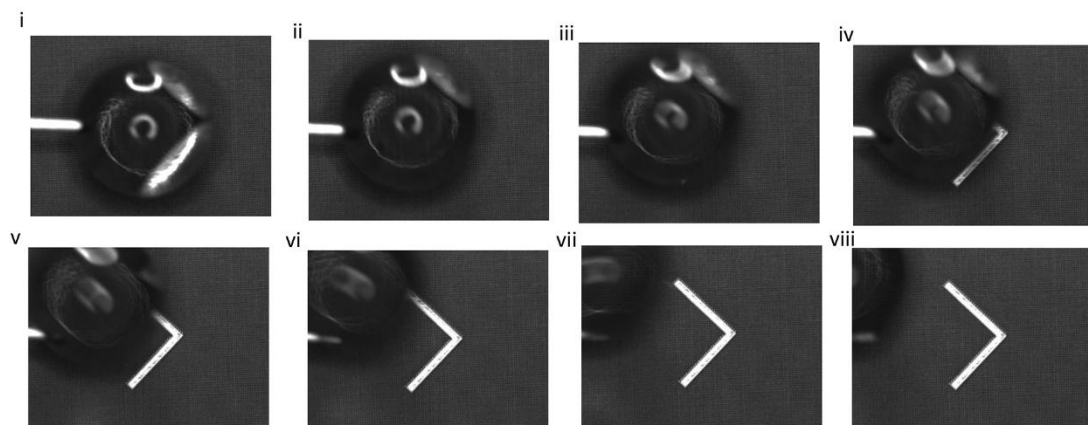

**Figure S5.** The time-lapsed images of droplet being pulled along D1 on the superamphiphobic surface with hydrophobic “>” shaped patterns.

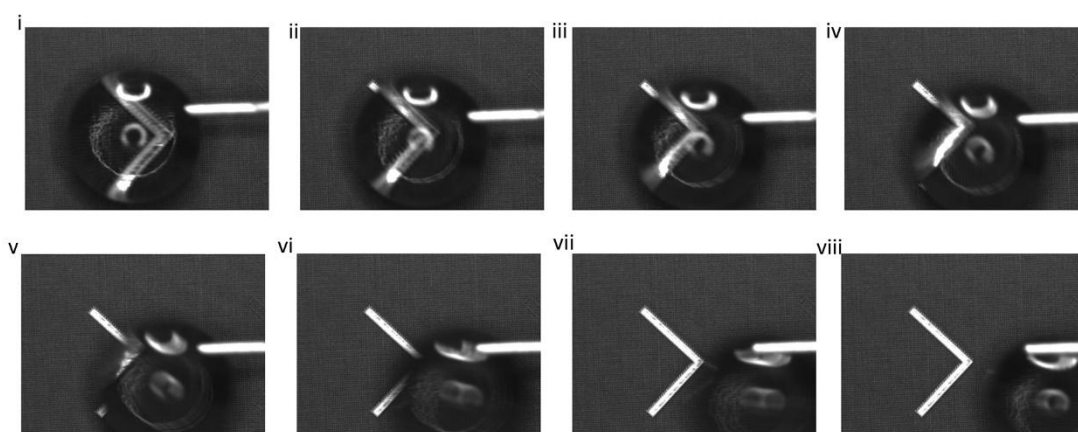

**Figure S6.** The time-lapsed images of droplet being pulled along D2 on the superamphiphobic surface with hydrophobic “>” shaped patterns.

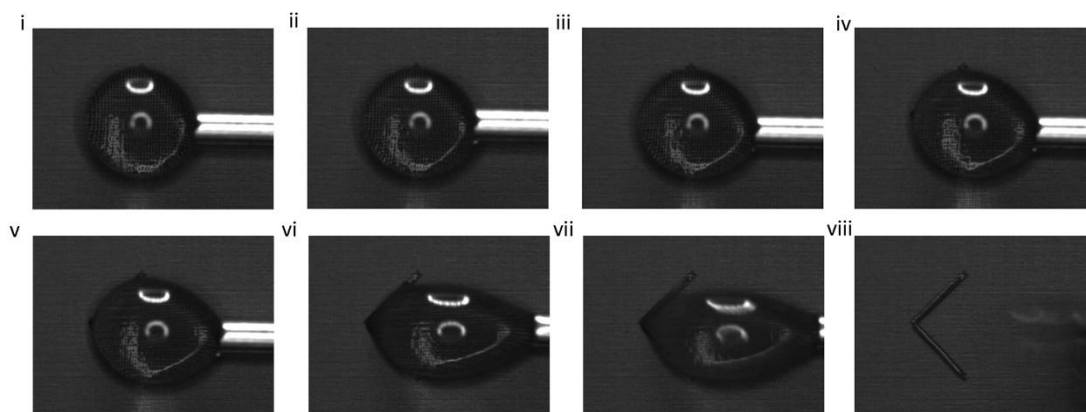

**Figure S7.** The time-lapsed images of droplet being pulled along D1 on the superamphiphobic surface with SHL “>” shaped patterns.

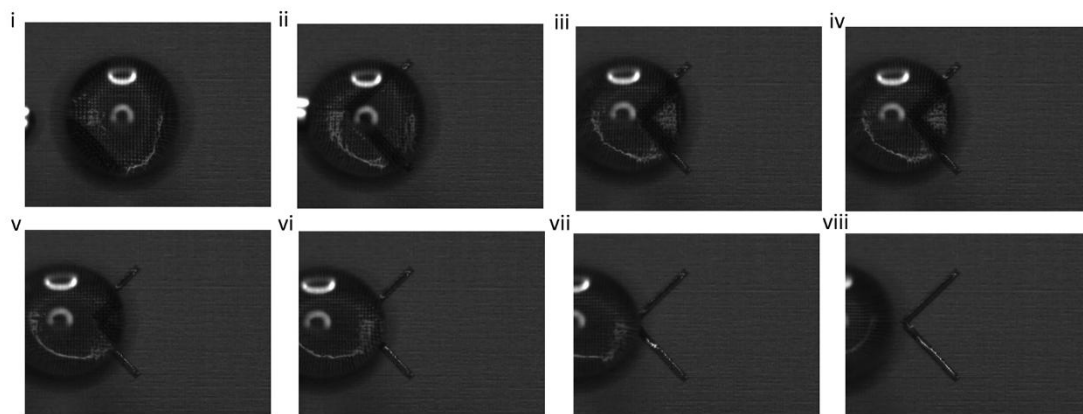

**Figure S8.** The time-lapsed images of droplet being pulled along D2 on the superamphiphobic surface with SHL “>” shaped patterns.



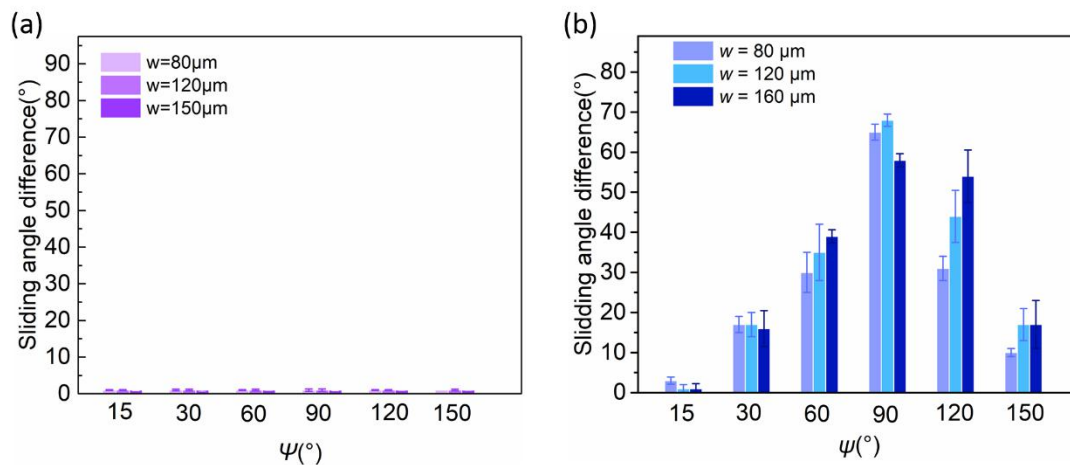

**Figure S9.** (a) The sliding angle differences (SADs) of the superamphiphobic surfaces with SHL “>” shaped patterns after being stored in atmosphere for 30 days. (b) The SADs of DASs after being stored in atmosphere for 30 days.

**Table S1.** The contact angles and sliding angles of different liquid on superamphiphobic (SAB) surface.

| Liquid      | Surface energy(J/m <sup>2</sup> ) | Contact angle(°) | Sliding Angle(°) |
|-------------|-----------------------------------|------------------|------------------|
| Water       | 72.8                              | 158~160          | 0.8~1.1          |
| Glycerol    | 64                                | 152~153          | 0.9~1.2          |
| Glycol      | 48.4                              | 152~153          | 1.8-2.7          |
| Peanut oil  | 34.5                              | 154~155          | 3.9-4.6          |
| Hexadecane  | 27.5                              | 150~151          | 6.5~7.2          |
| Tetradecane | 26.6                              | 151~152          | 9.5~10.3         |
| Dodecane    | 25.4                              | 152~154          | 10.0-11.2        |
